# Supplementary material
Source: PubMed Central journal article supplement (PMC3253196)
Supplement: NIHMS333263-supplement-1_si_001.pdf [file NIHMS333263-supplement-1_si_001.pdf]

## Supporting Information

### **A Proteomic Survey of Nonribosomal Peptide and Polyketide Biosynthesis in Actinobacteria**

Yunqiu Chen<sup>1,2</sup>, Ioanna Ntai<sup>1,2</sup>, Kou-San Ju<sup>3</sup>, Michelle Unger<sup>1,2</sup>, Leonid Zamdborg<sup>4</sup>, Sarah J. Robinson<sup>1,2</sup>, James R. Doroghazi<sup>3</sup>, William W. Metcalf<sup>3</sup>, Neil L.

Kelleher<sup>\*1-3</sup>

<sup>1</sup>Department of Chemistry, <sup>2</sup>Chemistry of Life Processes Institute, Northwestern University, Evanston, Illinois, 60208, United States

<sup>3</sup>The Institute for Genomic Biology, <sup>4</sup>College of Medicine, University of Illinois at Urbana-Champaign, Urbana, Illinois, 61801, United States

\*Corresponding author.

Prof. Neil Kelleher. Phone: +1-847-467-4362 Fax: +1-847-467-3276

E-mail: [n-kelleher@northwestern.edu](mailto:n-kelleher@northwestern.edu)

## Supplementary Tables

**Supplementary Table 1.** Taxonomy of the six actinomycetes yielding NRPS and/or PKS identifications. The taxonomy is determined based on the 16S rRNA sequence. Also listed are the growth medium and culturing time where NRPS/PKS were identified by LC-MS/MS.

| Strain NRRL # | Taxonomy                 | Growth medium / time |
|---------------|--------------------------|----------------------|
| F-6133        | <i>Kitasatospora sp.</i> | 4×R2A / day 2        |
| F-6134        | <i>Streptomyces sp.</i>  | 4×R2A / day 1        |
| F-6143        | <i>Streptomyces sp.</i>  | 4×R2A / day 2        |
| F-6562        | <i>Streptomyces sp.</i>  | 4×R2A / day 1        |
| F-6652        | <i>Streptomyces sp.</i>  | MSB / day 1          |
| F-6556        | <i>Nocardiopsis sp.</i>  | 4×R2A / day 1        |

**Supplementary Table 2.** NRPS/PKS identifications from six Actinobacteria strains using PrISM approach. **(a)** Peptide identifications from OMSSA search for strains F-6562, F-6556 and F-6133, where peptides were identified as coming from different NRPS/PKS proteins. **(b)** Peptide identifications for strains F-6133 and F-6556 from *de novo* sequencing and homology search using PEAKS studio, each peptide with its homologous peptide/protein shown. **(c)** Protein identifications from OMSSA search, where each protein has multiple peptides identified. Peptides listed in Supplementary Table 2(a) do not overlap with those from 2(c).

**(a) Peptide identifications from OMSSA**

| Peptide sequence     | E-value   | Precursor mass | Charge | Mass error (Da) | Accession # | Protein description                                                          |
|----------------------|-----------|----------------|--------|-----------------|-------------|------------------------------------------------------------------------------|
| <b>Strain F-6562</b> |           |                |        |                 |             |                                                                              |
| TGAAYLPLDLHPADR      | 2.496E-8  | 576.627        | 3      | 0.006           | ZP_06907900 | non-ribosomal peptide synthetase [Streptomyces pristinaespiralis ATCC 25486] |
| EIFDPAIASAGGR        | 5.210E-8  | 652.338        | 2      | 0.005           | ZP_06907900 | non-ribosomal peptide synthetase [Streptomyces pristinaespiralis ATCC 25486] |
| GDEALDDLVGFFVNTLVLR  | 2.087E-3  | 698.378        | 3      | 0.003           | ZP_06907900 | non-ribosomal peptide synthetase [Streptomyces pristinaespiralis ATCC 25486] |
| DLTTAYAAR            | 7.489E-3  | 491.255        | 2      | 0.002           | ZP_06907900 | non-ribosomal peptide synthetase [Streptomyces pristinaespiralis ATCC 25486] |
| GVRPQDPVAVLLGR       | 1.280E-17 | 492.961        | 3      | 0.005           | ZP_06271943 | amino acid adenylation domain protein [Streptomyces sp. ACTE]                |
| VTGVNLLPSFLAAmPDDR   | 4.139E-14 | 968.503        | 2      | 0.005           | ZP_06271943 | amino acid adenylation domain protein [Streptomyces sp. ACTE]                |
| ILTELFALYTAR         | 4.925E-7  | 705.906        | 2      | 0.005           | ZP_06271943 | amino acid adenylation domain protein [Streptomyces sp. ACTE]                |
| TVGWFTSEYPVR         | 8.251E-7  | 721.362        | 2      | 0.006           | ZP_06271943 | amino acid adenylation domain protein [Streptomyces sp. ACTE]                |

|                                            |           |         |   |        |              |                                                                                    |
|--------------------------------------------|-----------|---------|---|--------|--------------|------------------------------------------------------------------------------------|
| mGAGTDIPLGAPIAGR                           | 8.387E-12 | 756.897 | 2 | -0.001 | YP_003339147 | non-ribosomal peptide synthetase-like protein [Streptosporangium roseum DSM 43021] |
| <b>Supplementary Table 2(a). Continued</b> |           |         |   |        |              |                                                                                    |
| DPAYLAELIR                                 | 6.970E-9  | 580.821 | 2 | 0.003  | YP_003339147 | non-ribosomal peptide synthetase-like protein [Streptosporangium roseum DSM 43021] |
| ADGNLDFLGR                                 | 5.814E-4  | 539.270 | 2 | 0.001  | YP_003339147 | non-ribosomal peptide synthetase-like protein [Streptosporangium roseum DSM 43021] |
| GAGIEDVVALALPR                             | 2.278E-5  | 690.898 | 2 | 0.005  | YP_001510190 | amino acid adenylation domain-containing protein [Frankia sp. EAN1pec]             |
| LAWmQAEYR                                  | 2.791E-3  | 592.285 | 2 | 0.001  | ZP_04691513  | CDA peptide synthetase I [Streptomyces roseosporus NRRL 15998]                     |
| RADGAVEYLGR                                | 1.232E-3  | 603.816 | 2 | 0.003  | YP_289922    | amino acid adenylation [Thermobifida fusca YX]                                     |
| FVADPFGEPPER                               | 1.528E-7  | 660.816 | 2 | 0.003  | YP_001105238 | putative non-ribosomal peptide synthetase [Saccharopolyspora erythraea NRRL 2338]  |
| LFDTLFVLR                                  | 3.337E-8  | 562.331 | 2 | 0.004  | YP_003494015 | NRPS/siderophore biosynthesis protein [Streptomyces scabiei 87.22]                 |
| VELGEIESVLAR                               | 3.402E-8  | 657.868 | 2 | 0.002  | YP_702172    | non-ribosomal peptide synthetase [Rhodococcus jostii RHA1]                         |
| FVADPYGPPGSR                               | 2.500E-6  | 631.813 | 2 | 0.003  | YP_289923    | non-ribosomal peptide synthase:amino acid adenylation [Thermobifida fusca YX]      |
| AAG(I/L)TLTPR                              | 2.889E-3  | 450.259 | 2 | -0.001 | YP_003274810 | amino acid adenylation domain-containing protein [Gordonia bronchialis DSM 43247]  |
| AEDVVAVALPR                                | 1.761E-9  | 570.326 | 2 | 0.003  | ZP_06830500  | possible non-ribosomal peptide synthetase [Rhodococcus equi ATCC 33707]            |
| <b>Strain F-6556</b>                       |           |         |   |        |              |                                                                                    |
| FVADPYGPPGSR                               | 1.949E-5  | 631.814 | 2 | 0.005  | YP_289923    | non-ribosomal peptide synthase:amino acid adenylation [Thermobifida fusca YX]      |
| TPAMVVNVLPLR                               | 1.983E-5  | 655.389 | 2 | 0.005  | YP_289923    | non-ribosomal peptide synthase:amino acid adenylation [Thermobifida fusca YX]      |

|                                           |          |         |   |        |              |                                                                                                        |
|-------------------------------------------|----------|---------|---|--------|--------------|--------------------------------------------------------------------------------------------------------|
| DDVVFQTVTSGR                              | 1.678E-4 | 626.813 | 2 | 0.003  | YP_003073479 | nonribosomal peptide synthetase [Teredinibacter turnerae T7901]                                        |
| FVADPYGAPGAR                              | 3.772E-6 | 610.808 | 2 | 0.004  | ZP_07274839  | non-ribosomal peptide synthetase [Streptomyces sp. SPB78]                                              |
| <b>Supplementary Table 2(a) Continued</b> |          |         |   |        |              |                                                                                                        |
| GYVGRPDLTAER                              | 9.355E-3 | 667.346 | 2 | -0.001 | ADK54820     | non-ribosomal peptide synthase [uncultured soil bacterium]                                             |
| AAADALLR                                  | 6.989E-3 | 400.731 | 2 | -0.008 | YP_289921    | amino acid adenylation [Thermobifida fusca YX]                                                         |
| QHVVAVALPR                                | 6.883E-7 | 545.330 | 2 | 0.000  | ZP_04617272  | Non-ribosomal peptide synthetase modules and protein [Yersinia ruckeri ATCC 29473]                     |
| THDDYLYSVR                                | 5.778E-3 | 634.802 | 2 | 0.008  | ZP_04507696  | peptide arylation enzyme [Saccharomonospora viridis DSM 43017]                                         |
| <b>Strain F-6133</b>                      |          |         |   |        |              |                                                                                                        |
| ADGLLDFLGR                                | 3.117E-6 | 538.790 | 2 | 0.008  | ZP_06907900  | non-ribosomal peptide synthetase [Streptomyces pristinaespiralis ATCC 25486]                           |
| LVEALNPPR                                 | 2.729E-5 | 504.797 | 2 | 0.002  | YP_003133692 | amino acid adenylation enzyme/thioester reductase family protein [Saccharomonospora viridis DSM 43017] |
| RRPDGALDYLGR                              | 9.508E-5 | 463.586 | 3 | 0.005  | ZP_06830731  | non-ribosomal peptide synthetase [Rhodococcus equi ATCC 33707]                                         |
| FVADPFGEPPGAR                             | 3.717E-4 | 631.815 | 2 | 0.007  | YP_003765295 | non-ribosomal peptide synthetase [Amycolatopsis mediterranei U32]                                      |
| AHGLAITPR                                 | 2.167E-3 | 468.276 | 2 | 0.002  | YP_002779515 | non-ribosomal peptide synthetase [Rhodococcus opacus B4]                                               |
| DLDAAYTAR                                 | 8.559E-6 | 498.244 | 2 | 0.001  | ZP_06477171  | amino acid adenylation domain protein [Frankia symbiont of Datisca glomerata]                          |
| FDLAAPPLLR                                | 4.032E-6 | 556.829 | 2 | 0.004  | YP_289922    | amino acid adenylation [Thermobifida fusca YX]                                                         |
| LVEVNPFR                                  | 5.112E-4 | 527.799 | 2 | 0.001  | ADI04487     | amino acid adenylation domain-containing protein [Streptomyces bingchenggensis BCW-1]                  |
| QDVVFGATVSGR                              | 4.741E-5 | 618.325 | 2 | 0.006  | ZP_06587758  | non-ribosomal peptide synthetase [Streptomyces roseosporus NRRL 15998]                                 |

**(b)**

## Peptide identifications from PEAKS Studio

| Peptide from <i>de novo</i> sequencing and its homolog | PEAKS Spider Score | Precursor mass | Charge | Mass error (Da) | Protein accession# | Protein description                                                               |
|--------------------------------------------------------|--------------------|----------------|--------|-----------------|--------------------|-----------------------------------------------------------------------------------|
| <b>Strain F-6133</b>                                   |                    |                |        |                 |                    |                                                                                   |
| RFDLEAPLLR<br>                                         | 28                 | 663.883        | 2      | 0.008           | EDY61723           | non-ribosomal peptide synthetase [Streptomyces pristinaespiralis ATCC 25486]      |
| RFDLAAPPLFR<br>AELFDPVVASAGGR<br>                      | 21.92              | 694.865        | 2      | 0.008           | EDY61723           | non-ribosomal peptide synthetase [Streptomyces pristinaespiralis ATCC 25486]      |
| ELFDPALASAGGR<br>QGPEKVVALGLPR<br>                     | 22.15              | 682.39         | 2      | -0.03           | EEN84327           | amino acid adenylation domain protein [Rhodococcus erythropolis SK121]            |
| AGPEKLVALGLPR<br>LDGSVEYLGR<br>                        | 23                 | 554.79         | 2      | 0.011           | CAM02313           | putative non-ribosomal peptide synthetase [Saccharopolyspora erythraea NRRL 2338] |
| PDGAVEYLGR<br>QEVVALGLPR<br>+                          | 23                 | 541.32         | 2      | -0.002          | EEN84327           | amino acid adenylation domain protein [Rhodococcus erythropolis SK121]            |
| ETVVALGLPR<br>SIDmVALSFAVLR<br>                        | 20.54              | 719.39         | 2      | -0.002          | EEN84327           | amino acid adenylation domain protein [Rhodococcus erythropolis SK121]            |
| SVDMVVALFAVLR                                          |                    |                |        |                 |                    |                                                                                   |

|            |    |        |   |       |          |                                                                        |  |
|------------|----|--------|---|-------|----------|------------------------------------------------------------------------|--|
| A EGLALSPR |    |        |   |       |          |                                                                        |  |
|            | 20 | 457.26 | 2 | 0.004 | EEN84327 | amino acid adenylation domain protein [Rhodococcus erythropolis SK121] |  |
| AAGLSLSPR  |    |        |   |       |          |                                                                        |  |

**Supplementary Table 2(b). Continued**

|              |       |        |   |       |              |                                                                              |  |
|--------------|-------|--------|---|-------|--------------|------------------------------------------------------------------------------|--|
| TPAALAAVADTR |       |        |   |       |              |                                                                              |  |
|              | 20.5  | 578.82 | 2 | 0.003 | YP_001821960 | putative NRPS [Streptomyces griseus subsp. griseus NBRC 13350]               |  |
| TPAALARAAATA |       |        |   |       |              |                                                                              |  |
| LWTVTALFAVLR |       |        |   |       |              |                                                                              |  |
|              | 16.63 | 695.34 | 2 | -0.15 | EDY6172      | non-ribosomal peptide synthetase [Streptomyces pristinaespiralis ATCC 25486] |  |
| LEMVVALFAVLR |       |        |   |       |              |                                                                              |  |

**Strain F-6556**

|                   |      |         |   |       |              |                                                                                                                        |  |
|-------------------|------|---------|---|-------|--------------|------------------------------------------------------------------------------------------------------------------------|--|
| WDEDGLLDYLGR      |      |         |   |       |              |                                                                                                                        |  |
|                   | 24.5 | 726.347 | 2 | 0.009 | ACR31310     | Arthrofactin synthetase/syringopeptin synthetase C-related non-ribosomal peptide synthetase [Burkholderia glumae BGR1] |  |
| WQADGTLDYLR       |      |         |   |       |              |                                                                                                                        |  |
| DDGPDEVVTGTQGR    |      |         |   |       |              |                                                                                                                        |  |
| +                 | 20.5 | 723.332 | 2 | 0.009 | ABB73286     | putative polyketide synthase [uncultured bacterium 2063G]                                                              |  |
| DEGAPHVVTGTAGS    |      |         |   |       |              |                                                                                                                        |  |
| TDGTLDLFLGR       |      |         |   |       |              |                                                                                                                        |  |
| +                 | 25.5 | 547.781 | 2 | 0.009 | ACR31310     | Arthrofactin synthetase/syringopeptin synthetase C-related non-ribosomal peptide synthetase [Burkholderia glumae BGR1] |  |
| ADGTLDYLGR        |      |         |   |       |              |                                                                                                                        |  |
| HDVVFGQPVSGR      |      |         |   |       |              |                                                                                                                        |  |
|                   | 22.5 | 649.339 | 2 | 0.008 | EEN85381     | amino acid adenylation domain protein [Rhodococcus erythropolis SK121]                                                 |  |
| DDVVFGGTVSGR      |      |         |   |       |              |                                                                                                                        |  |
| [WW] GPGDTVALALPR |      |         |   |       |              |                                                                                                                        |  |
| +                 | 25   | 769.914 | 2 | 0.012 | YP_001106481 | putative non-ribosomal peptide synthetase [Saccharopolyspora erythraea NRRL 2338]                                      |  |
| GL GPGDVVALALPK   |      |         |   |       |              |                                                                                                                        |  |

FVADPFSGGPKR

||||| | |

25.79

639.319

2

-0.031

YP\_002782356

non-ribosomal peptide synthetase [Rhodococcus opacus B4]

FVADPFGGPGDR

**(c) protein identifications from OMSSA**

| Strain<br>NRRL# | Protein description                                                          | Protein<br>accession # | OMSSA<br>Protein score | Sequence<br>coverage(%) | # Peptides<br>identified | Protein<br>size<br>(kDa) |
|-----------------|------------------------------------------------------------------------------|------------------------|------------------------|-------------------------|--------------------------|--------------------------|
| F-6133          | modular polyketide synthase BFAS1 [Kitasatospora setae KM-6054]              | BAJ33099               | -829.74                | 3.08                    | 9                        | 495.9                    |
|                 | modular polyketide synthase BFAS2 [Kitasatospora setae KM-6054]              | BAJ33100               | -2072.05               | 4.9                     | 17                       | 517.3                    |
|                 | modular polyketide synthase BFAS3 [Kitasatospora setae KM-6054]              | BAJ33101               | -701.79                | 2.37                    | 7                        | 408.5                    |
|                 | modular polyketide synthase BFAS4 [Kitasatospora setae KM-6054]              | BAJ33102               | -862.46                | 2.53                    | 7                        | 354.9                    |
|                 | modular polyketide synthase BFAS5 [Kitasatospora setae KM-6054]              | BAJ33099               | -524.83                | 4.22                    | 8                        | 218.0                    |
| F-6143          | non-ribosomal peptide synthetase [Streptomyces sp. e14]                      | ZP_06712119            | -791.23                | 29.47                   | 7                        | 40.4                     |
|                 | non-ribosomal peptide synthetase [Streptomyces sp. e14]                      | ZP_06712118            | -718.39                | 27.46                   | 11                       | 73                       |
|                 | non-ribosomal peptide synthetase [Streptomyces sp. e14]                      | ZP_0671212             | -362.05                | 20.93                   | 8                        | 63                       |
| F-6134          | modular polyketide synthase [Streptomyces avermitilis MA-4680]               | NP_821590              | -255.97                | 2.98                    | 8                        | 353.4                    |
|                 | modular polyketide synthase [Streptomyces avermitilis MA-4680]               | NP_821591              | -1264.31               | 2.83                    | 11                       | 642.0                    |
|                 | modular polyketide synthase [Streptomyces avermitilis MA-4680]               | NP_821592              | -287.04                | 3.43                    | 5                        | 192.2                    |
|                 | modular polyketide synthase [Streptomyces avermitilis MA-4680]               | NP_821593              | -99.99                 | 2.05                    | 6                        | 371.3                    |
|                 | modular polyketide synthase [Streptomyces avermitilis MA-4680]               | NP_821594              | -308.06                | 2.10                    | 12                       | 806.3                    |
|                 | peptide synthetase [Streptomyces anulatus]                                   | ADG27359               | -69.47                 | 2.17                    | 7                        | 462.2                    |
| F-6652          | amino acid adenylation domain protein [Streptomyces flavogriseus ATCC 33331] | ZP_05803230            | -185.68                | 4.27                    | 15                       | 511.1                    |
|                 | amino acid adenylation domain protein [Streptomyces flavogriseus ATCC 33331] | ZP_05803229            | -407.69                | 10.53                   | 15                       | 226.2                    |
|                 | amino acid adenylation domain protein [Streptomyces flavogriseus ATCC 33331] | ADW01610               | -346.49                | 2.66                    | 6                        | 339.8                    |





**Supplementary Table 3.** Primers used for PCR amplification of target region for (a) F-6133 (b) F-6562 and (c) F-6556.

**(a) PCR primers for strain F-6133**

| Peptide Sequence | Primer                | Primer Sequence                    |
|------------------|-----------------------|------------------------------------|
| ADGLLDLFLGR      | 6133 1F               | CTGGACTTCCTGGGCCGC                 |
|                  | 6133 1DF <sup>1</sup> | MTSMTSGAYTTCMTSGGNMGB <sup>2</sup> |
|                  | 6133 1R               | GCGGCCAGGAAGTCCAG                  |
|                  | 6133 1DR              | VCKNCCSAKGAARTCSAKSAK              |
| LVEALNPPR        | 6133 2F               | GAGGCCCTGAACCCGCC                  |
|                  | 6133 2DF              | GARGCSMTSAACCCSCCS                 |
|                  | 6133 2R               | GGCGGGTTCAGGGCCTC                  |
|                  | 6133 2DR              | SGGSGGGTTSKSGCYTC                  |
| RFDLEAPLLR       | 6133 3R               | GGCCTCCAGGTCGAAGCG                 |
|                  | 6133 3DR              | GGSGCYTCSAKRTCGAAVCK               |
| AELFDPVVASAGGR   | 6133 4F               | TTCGACCCGGTCGTCGC                  |
|                  | 6133 4DF              | TTCGAYCCSGTSGTSGC                  |
| QGPEKVVALGLPR    | 6133 5F               | GTCGTGCGCCCTGGGCCT                 |
|                  | 6133 5DF              | GTSGTSGCSMTSGGNMTS                 |
|                  | 6133 5R               | AGGCCAGGGCGACGAC                   |
|                  | 6133 5DR              | SAKNCCSAKSGCSACSAC                 |
| LDGSVEYLGR       | 6133 6F               | TCCGTGAGTACCTGGGC                  |
|                  | 6133 6DF              | GGNWSSGTSGARTAYMTSGG               |
|                  | 6133 6R               | GCCCAGGTACTCGACGGA                 |
|                  | 6133 6DR              | CCSAKRTAYTCSACSSWNCC               |
| EQVVALGLPR       | 6133 7F               | GTCGTGCGCCCTGGGCCT                 |
|                  | 6133 7DF              | GTSGCSMTSGGNMTSCC                  |
| SIDMVALSFAVLR    | 6133 8F1              | GACATGGTCGCCCTGTCCTT               |
|                  | 6133 8DF1             | GAYATGGTSGCSMTSWSSTTC              |
|                  | 6133 8F2              | TCCTTCGCCGTCTGCG                   |
|                  | 6133 8DF2             | WSSTTCGCSGTSMTSMGB                 |
|                  | 6133 8R1              | AAGGACAGGGCGACCATGTC               |
|                  | 6133 8DR1             | GAASSWSAKSGCSACCATRT C             |
|                  | 6133 8R2              | CGCAGGACGGCGAAGGA                  |
|                  | 6133 8DR2             | VCKSAKSACSGCGAASSW                 |
| EAGLALSPR        | 6133 9F               | GGCCTGGCCCTGTCCCC                  |
|                  | 6133 9DF              | GGNMTSGCSMTSWSSCC                  |
|                  | 6133 9R               | GGGACAGGGCCAGGCC                   |
|                  | 6133 9DR              | GGSSWSAKSGCSAKNCC                  |
| TPAALAAVADTR     | 6133 10F              | CGTCGCCGACACCCGC                   |
|                  | 6133 10DF             | GCSGTSGCSGAYACSMG                  |
|                  | 6133 10R              | GCGGGTGTGCGGCGACG                  |
|                  | 6133 10DR             | CKSGTRTCSGCSACSGC                  |

**Supplementary Table 3(a). Continued**

|               |           |                        |
|---------------|-----------|------------------------|
| LWTVTALFAVLR  | 6133 11F  | ACCGCCCTGTTGCGCGT      |
|               | 6133 11DF | ACSGCSMTSTTCGCSGT      |
|               | 6133 11R  | ACGGCGAACAGGGCGGT      |
|               | 6133 11DR | ACSGCGAASAKSGCSGT      |
| RRPDGALDYLGR  | 6133 12F  | CTGGACTACCTGGGCCGC     |
|               | 6133 12DF | GCSMTSGAYTAYMTSGGNMGB  |
|               | 6133 12R  | GCGGCCAGGTAGTCCAG      |
|               | 6133 12DR | VCKNCCSAKRTARTCSAKSG C |
| FVADPFGEPEGAR | 6133 14F  | GCCGACCCGTTGCGCG       |
|               | 6133 14DF | GCSGAYCCSTTCGGNGAR     |
|               | 6133 14R  | CGCCGAACGGGTCGGC       |
|               | 6133 14DR | YTCNCCGAAS GGRTCSGC    |
| AGDLAYALATGR  | 6133 15F  | GCCTACGCCCTGGCCAC      |
|               | 6133 15DF | GCSTAYGCSMTSGCSAC      |
|               | 6133 15R  | GTGGCCAGGGCGTAGGC      |
|               | 6133 15DR | GTSGCSAKSGCRTASGC      |
| AHGLAITPR     | 6133 16R  | CGCGGGGTGATGGCCA       |
|               | 6133 16DR | CKSGSGGTSAKTSGCSA      |
| DLDAAYTAR     | 6133 17F  | GACGCCGCCTACACCGC      |
|               | 6133 17DF | GAYGCSGCSTAYACSGC      |
|               | 6133 17R  | GCGGTGTAGGCGGGCGTC     |
|               | 6133 17DR | GCSGTRTASGCSGCRTC      |
| FDLAAPPLLR    | 6133 18F  | TTCGACCTGGCCGCC        |
|               | 6133 18DF | TTYGAYMTSGCSGCSCC      |
| LVEVVNPER     | 6133 19F  | GAGGTGTCACCCGGAGC      |
|               | 6133 19DF | GARGTSGTSAAYCCSGARMG   |
| QDVVFGATVSGR  | 6133 20F  | GTCTTCGGCGCCACCGTC     |
|               | 6133 20DF | GTSTTCGGNGCSACSGT      |

**(b) PCR primers for strain F-6562**

| Peptide Sequence        | Primer   | Primer Sequence           |
|-------------------------|----------|---------------------------|
| TGAAYLPLDLHPA<br>DR     | 6562 1DF | GCSGCSTAYMTSCCSMTSGA      |
|                         | 6562 1F  | GCCGCCTACCTGCCGCTG        |
| EIFDPAIASAGGR           | 6562 2DF | GARMTSTTCGAYCCSGCSMT      |
|                         | 6562 2F  | GAGATCTTCGACCCGGCCAT      |
|                         | 6562 2DR | AKSGCSGGRTCGAASAKYTC      |
|                         | 6562 2R  | ATGGCCGGGTCGAAGATCTC      |
| GDEALDDLVGFFVN<br>TLVLR | 6562 3DF | GAYMTSGTSGGNNTTYTTYGTS AA |
|                         | 6562 3F  | CTGGTCGGCTTCTTCGTCAAC     |
| DLTTAYAAR               | 6562 4DR | GCSGCRTASGCSGTSMT         |
|                         | 6562 4R  | GCGGCGTAGGCGGTGGT         |

**Supplementary Table 3 (b). Continued**

|                                    |           |                          |
|------------------------------------|-----------|--------------------------|
| GVRPQDPVAVLLGR                     | 6562 5DF  | CCSGTSGCSGTSMTSMT        |
|                                    | 6562 5F   | CCGGTCGCCGTCTGCT         |
| VTGVNLLPSFLAA <sub>m</sub><br>PDDR | 6562 6DF1 | CSGCSATGCCSGAYGA         |
|                                    | 6562 6DF2 | WSSTTYMTSGCSGCSATG       |
|                                    | 6562 6F   | CCGCCATGCCGGACGA         |
|                                    | 6562 6DR1 | TCRTCSGGCATSGCSG         |
|                                    | 6562 6R   | TCGTCCGGCATGGCGG         |
| ILTELFALYTAR                       | 6562 7DR  | CKSGCSGTRTASAKSGCRAA     |
|                                    | 6562 7R   | GGGCGGTGTACAGGGCGAA      |
| TVGWFTSEYPVR                       | 6562 8DF  | TGGTTYACSWSSGARTAYCCSG   |
|                                    | 6562 8F   | TGGTTCACCTCCGAGTACCCG    |
|                                    | 6562 8DR  | CSGGRTAYTCSSWSGTRAACCA   |
|                                    | 6562 8R   | CGGGTACTCGGAGGTGAACCA    |
| mGAGTDIPLGAPIAG<br>R               | 6562 9DF  | GGNACSGAYMTSCCSMTSG      |
|                                    | 6562 9F   | GGCACCGACATCCCGCT        |
| DPAYLAELIR                         | 6562 10DF | GCSTAYMTSGCSGARMTSMT     |
|                                    | 6562 10F  | GCCTACCTGGCCGAGCTGATC    |
|                                    | 6562 10DR | AKSAKYTCSGCSAKRTASGC     |
|                                    | 6562 10R  | GATCAGCTCGGCCAGGTAGGC    |
| ADGNLDFLGR                         | 6562 11DR | GAARTCSAKRTTNCRCRCSGC    |
|                                    | 6562 11R  | AAGTCCAGGTTGCCGTCGGC     |
| GAGIEDVVALALPR                     | 6562 12DF | GARGAYGTSMTSGCSMTSGC     |
|                                    | 6562 12F  | GAGGACGTCGTCGCCCTGG      |
| LAW <sub>m</sub> QAEYR             | 6562 13DF | GCSTGGATGCARGCSGARTA     |
|                                    | 6562 13F  | GCCTGGATGCAGGCCGAGTA     |
| RADGAVEYLGR                        | 6562 14DR | AKRTAYTCSACSGCNCRCR      |
|                                    | 6562 14R  | GGTACTCGACGGCGCCGTC      |
| FVADPFGEPPER                       | 6562 15DR | GYTCNCCRAASGGRTCSGC      |
|                                    | 6562 15R  | TCGCCGAACGGGTCGG         |
| LFDTLFVLR                          | 6562 16DF | TTYGAYACSMSTTTYGTSMTSCG  |
|                                    | 6562 16F  | TTCGACACCCTGTTCGTCCTG    |
|                                    | 6562 16DR | CGSAKSACRAASAKSGTRTC RAA |
|                                    | 6562 16R  | CAGGACGAACAGGGTGTGCGA A  |
| VELGEIESVLAR                       | 6562 17DR | TCSAKYTCNCCSAKYTCSAC     |
|                                    | 6562 17R  | TCGATCTCGCCAGCTCGAC      |
| FVADPYGPPGSR                       | 6562 18DR | CCRTASGGRTCSGCSACRAA     |
|                                    | 6562 18R  | GTACGGGTCGGCGACGAA       |

**Supplementary Table 3 (b). Continued**

|               |           |                      |
|---------------|-----------|----------------------|
| AAG(I/L)TLTPR | 6562 19DR | GSGTSAKSGTSAKNCCSGC  |
|               | 6562 19R  | GCSGGNMTSACSMTSACSC  |
| ADGAVEYIGR    | 6562 20DR | RTAYTCSACSGCNCCRTCSG |
|               | 6562 20R  | GTACTCGACGGCGCCGTC   |

**(c) PCR Primers for strain F-6556**

| Peptide Sequence | Primer    | Primer Sequence                |
|------------------|-----------|--------------------------------|
| TPAMVVNVLPLR     | 6556 1F   | ATGGTGGTCAACGTGCTGCC           |
|                  | 6556 1R   | GGCAGCACGTTGACCACCAT           |
|                  | 6556 1DF  | ATGGTSGTSAAYGTSMTSCCS          |
|                  | 6556 1DR  | SGGSAKSACRTTSACSACCAT          |
| FVADPYGPPGSR     | 6556 2F   | GCCGACCCGTACGGCCC              |
|                  | 6556 2R   | GGGCCGTACGGGTCGGC              |
|                  | 6556 2DF  | GCSGAYCCSTAYGGNCCS             |
|                  | 6556 2DR  | SGGNCCRTASGGRTCSGC             |
| FVADPYGAPGAR     | 6556 3F   | GCCGACCCGTACGGCG               |
|                  | 6556 3R   | CGCCGTACGGGTCGGC               |
|                  | 6556 3DF  | GCNGAYCCSTAYGGNGCNC            |
|                  | 6556 3DR  | GNGCNCCRTASGGRTCNGC            |
| THDDYLYSVR       | 6556 4F   | ACCCACGACGACTACCTGTACTCG       |
|                  | 6556 4R   | CGAGTACAGGTAGTCGTCGTTGGT       |
|                  | 6556 4DF  | ACSCAYGAYGAYTAYMTSTAYWSB<br>GT |
|                  | 6556 4DR  | CVSWRTASAKRTARTCRTCRTGSGT      |
| GYVGRPDLTAER     | 6556 5F   | GACCTGACCGCCGAGCG              |
|                  | 6556 5R   | CGCTCGGCGGTCAGGTC              |
| VLVGGEAVPESLAAR  | 6556 6F   | GAATCCCTGGCCGCCCCG             |
|                  | 6556 6R   | CGGGCGGCCAGGGATTC              |
| FVADPFSGGPKR     | 6556 7F   | GATCCCTTCTCGGGCGGG             |
|                  | 6556 7R   | CCCGCCCGAGAAGGGATC             |
| WDEDGLLDYLGR     | 6556 9F   | GCTGGACTACCTGGGCCCGC           |
|                  | 6556 9R   | GCGGCCAGGTAGTCCAGC             |
|                  | 6556 9DF  | TSMTSGAYTAYMTSGGNCGS           |
|                  | 6556 9DR  | SCGNCCSAKRTARTCSAKSA           |
| DDGPDEVVTGTQGR   | 6556 10F  | GTGGTGACCGGCACCCAG             |
|                  | 6556 10R  | CTGGGTGCCGGTCACCAC             |
|                  | 6556 10DF | GARGTNGTNACSGGNACSCAR          |
|                  | 6556 10DR | YTSGTNCSSGTNACNACYTC           |
| TDGTLDFLGR       | 6556 11F  | CTGGACTTCCTGGGCCCGC            |
|                  | 6556 11R  | GCGGCCAGGAAGTCCAG              |
|                  | 6556 11DF | CSMTSGAYTTYMTSGGNCGS           |
|                  | 6556 11DR | SCGNCCSAKRAARTCSAKSG           |

**Supplementary Table 3(c). Continued**

|                  |           |                        |
|------------------|-----------|------------------------|
| HDVVFGQPVSGR     | 6556 12F  | GACGTGGTGTTCGGCCAGC    |
|                  | 6556 12R  | GCTGGCCGAACACCACGTC    |
|                  | 6556 12DF | GAYGTNGTNTTYGGNCARCCS  |
|                  | 6556 12DR | SGGYTGNCRCRAANACNACRTC |
| [WW]GPGDTVALALPR | 6556 13F  | GCGACACCGTGGCCCTG      |
|                  | 6556 13R  | CAGGGCCACGGTGTTCGC     |
|                  | 6556 13DF | GGNCCSGGNGAYACSGT      |
|                  | 6556 13DR | ACSGTRTCNCCSGGNCC      |

<sup>1</sup>Primers designed based on degenerate codons have a “D” designation, such as 1DF or 1DR, while those based on most likely codons do not.

<sup>2</sup>Standard abbreviations are used: Y, C or T; R, A or G; S, G or C; W, A or T; K, T or G; M, A or C; B, C, G or T; V, A, C or G; N, A, C, T or G.

**Supplementary Table 4.** PCR reactions completed for analysis of the genome of strains F-6133, F-6562 and F-6556

| PCR reaction number | Forward Primer | Reverse Primer | Expected Length (bp) |
|---------------------|----------------|----------------|----------------------|
| <b>F-6133</b>       |                |                |                      |
| 1 <sup>1</sup>      | A3F            | 1R             | 864                  |
| 2                   | 4F             | A7R            | 708                  |
| 3                   | 5F             | A7R            | 1000                 |
| 4                   | A3F            | 6R             | 750                  |
| 5                   | 8F1            | A7R            | 975                  |
| 6                   | 8F2            | A7R            | 975                  |
| 7                   | A7F            | 10R            | 600                  |
| 8                   | 11F            | A7R            | 1000                 |
| 9                   | A3F            | 12R            | 723                  |
| 10                  | A3F            | 13R            | 609                  |
| 11                  | A3F            | 14R            | 651                  |
| 12                  | KS1            | 15R            | 500                  |
| 14                  | A7F            | 16R            | 555                  |
| 15                  | 19F            | A3R            | 846                  |
| 16                  | KS1            | 21R            | 200                  |
| 17                  | 2F             | A7R            | 1581                 |
| 18                  | 7F             | A7R            | 1072                 |
| 19                  | A3F            | 9R             | 1230                 |
| 20                  | A3F            | 16R            | 1260                 |
| 21                  | 17F            | A3R            | 1419                 |
| 22                  | 18F            | A3R            | 1452                 |
| 23                  | 19F            | A7R            | 1600                 |
| 24                  | 20F            | A3R            | 1800                 |

**Supplementary Table 4. Continued**

|               |      |     |         |
|---------------|------|-----|---------|
| 25            | 21F  | M6R | 1200    |
| 26            | A7F  | 2R  | 2715    |
| 27            | A7F  | 3R  | 2400    |
| 28            | A7F  | 8R1 | 2250    |
| 29            | A7F  | 8R2 | 2250    |
| 30            | 12F  | A3R | 2500    |
| 31            | A7F  | 17R | 2781    |
| 32            | 17F  | A7R | 2100    |
| 33            | 18F  | A7R | 2160    |
| 34            | 20F  | A7R | 2500    |
| 35            | 1F   | A7R | 3192    |
| 36            | A3F  | 2R  | 3417    |
| 37            | A3F  | 3R  | 3000    |
| 38            | 4F   | A3R | 3240    |
| 39            | A7F  | 5R  | 3600    |
| 40            | 6F   | A7R | 3090    |
| 41            | 9F   | A3R | 3240    |
| 42            | 10F  | A3R | 3030    |
| 43            | A7F  | 11R | 3648    |
| 44            | A7F  | 13R | 3102    |
| 45            | 14F  | A7R | 3100    |
| 46            | A7F  | 22R | 3120    |
| 47            | 22F  | A3R | unknown |
| 48            | 12F  | 13R | 4758    |
| 49            | 12DF | 13R | 4758    |
| <b>F-6562</b> |      |     |         |
| 1             | 1F   | A3R | 300     |
| 2             | 1F   | A7R | 1100    |
| 3             | 2F   | A7R | 720     |
| 4             | 1F   | 2R  | 400     |
| 5             | 1DF  | 2R  | 400     |
| 6             | 3F   | A3R | 1000    |
| 7             | 3F   | A7R | 1700    |
| 8             | A7F  | 4R  | 1100    |
| 9             | A3F  | 4R  | 1800    |
| 10            | 5F   | A3R | 300     |
| 11            | 5F   | A7R | 1000    |
| 12            | 6F   | A7R | 400     |
| 13            | A3F  | 6R  | 300     |
| 14            | 5F   | 6R  | 600     |
| 15            | A7F  | 7R  | 2300    |
| 16            | A7F  | 8R  | 1440    |

**Supplementary Table 4. Continued**

|               |     |     |      |
|---------------|-----|-----|------|
| 17            | 8F  | A3R | 2300 |
| 18            | 9F  | A3R | 500  |
| 19            | 9F  | A7R | 1800 |
| 20            | A3F | 10R | 250  |
| 21            | 10F | A7R | 486  |
| 22            | A3F | 11R | 760  |
| 23            | 12F | A3R | 300  |
| 24            | 12F | A7R | 1000 |
| 25            | 13F | A7R | 630  |
| 26            | A3F | 14R | 762  |
| 27            | A3F | 15R | 670  |
| 28            | 2F  | 15R | 600  |
| 29            | 16F | A3R | 780  |
| 30            | 16F | A7R | 1500 |
| 31            | A7F | 16R | 1700 |
| 32            | A3F | 17R | 762  |
| 33            | A3F | 18R | 690  |
| 34            | 10F | 18R | 450  |
| 35            | A3F | 19R | 1250 |
| 36            | A7F | 19R | 500  |
| 37            | A3F | 20R | 774  |
| <b>F-6556</b> |     |     |      |
| 1             | 1F  | 2R1 | 1650 |
| 2             | 1F  | 2R2 | 1650 |
| 3             | 1F  | A3R | 950  |
| 4             | 1F  | A7R | 1650 |
| 5             | 14F | 6R  | 1350 |
| 6             | A7F | 6R  | 2300 |
| 7             | A3F | 6R  | 3000 |
| 8             | 12F | 13R | 700  |
| 9             | 12F | A7R | 1650 |
| 10            | 12F | A3R | 1000 |
| 11            | 9F  | A3R | 4400 |
| 12            | A3F | 9R  | 750  |
| 13            | 9F  | A7R | 3000 |
| 14            | 4F  | 10R | 300  |
| 15            | 7F  | 4R  | 3500 |
| 16            | 6F  | 4R  | 3500 |
| 17            | A3F | 2R  | 750  |
| 18            | A3F | 3R  | 750  |
| 19            | 5F  | 12R | 2400 |
| 20            | 5F  | A3R | 3000 |



**Supplementary Table 4. Continued**

|    |     |     |      |
|----|-----|-----|------|
| 21 | 5F  | A7R | 3700 |
| 22 | 5F  | 13R | 3000 |
| 23 | A3F | 11R | 750  |

<sup>1</sup> Same PCR reactions were set up for primers based on both the most likely codons and degenerate codons. For example, reaction 1 is performed twice, one using A3F and 1R, and the other using A3F and 1DR.

**Supplementary Table 5.** PCR amplicons from strains NRRL F-6133, F-6562 and F-6556 whose translated nucleotides were identified by OMSSA search. The primers used for the PCR reaction, the length of the translated nucleotides, and the number of peptides detected from them were listed. The most homologous protein is determined by BLASTX analysis of the translated nucleotides of the PCR amplicon.

| Strain NRRL#   | primers used in PCR reaction | Length of translated nucleotides (aa) | # Peptides detected | Accession # and description of the most homologous protein                                               | % identity/similarity at the protein level                                                       |
|----------------|------------------------------|---------------------------------------|---------------------|----------------------------------------------------------------------------------------------------------|--------------------------------------------------------------------------------------------------|
| F-6133         | 6133 2F<br>A7R               | 140                                   | 7                   | ACZ86404, non-ribosomal peptide synthetase-like protein [ <i>Streptosporangium roseum</i> DSM 43021]     | 45/57                                                                                            |
|                | 11DF<br>A7R                  | 342                                   | 6                   | EFL03209, non-ribosomal peptide synthetase [ <i>Streptomyces</i> sp. SPB78]                              | 71/82                                                                                            |
| F-6562         | 6562 2F<br>A7R               | 203                                   | 2                   | ZP_06907900, non-ribosomal peptide synthetase [ <i>Streptomyces pristinaespiralis</i> ATCC 25486]        | 78/82                                                                                            |
|                | 6562 1DF<br>6562 2R          | 108                                   | 2                   | ZP_06907900, non-ribosomal peptide synthetase [ <i>Streptomyces pristinaespiralis</i> ATCC 25486]        | 81/88                                                                                            |
|                | 6562 2F<br>6562<br>15DR      | 191                                   | 1                   | YP_003339147, non-ribosomal peptide synthetase-like protein [ <i>Streptosporangium roseum</i> DSM 43021] | 77/82                                                                                            |
|                | 6562 6F<br>A7R               | 122                                   | 1                   | ZP_06271943, amino acid adenylation domain protein [ <i>Streptomyces</i> sp. SA3_actE]                   | 60/65                                                                                            |
|                | 6562 9DF<br>A7R              | 81                                    | 1                   | ZP_06774222, non-ribosomal peptide synthetase [ <i>Streptomyces clavuligerus</i> ATCC 27064]             | 63/73                                                                                            |
|                | F-6556                       | 6556 1F<br>6556 2R                    | 472                 | 12                                                                                                       | YP_289923, non-ribosomal peptide synthase:amino acid adenylation [ <i>Thermobifida fusca</i> YX] |
| <del>A3F</del> |                              | <del>181</del>                        | <del>5</del>        | <del>YP_289923, non-ribosomal peptide</del>                                                              | <del>63/72</del>                                                                                 |

|          |     |   |                                                                                |       |
|----------|-----|---|--------------------------------------------------------------------------------|-------|
| 6556 6SR |     |   | synthase:amino acid adenylation<br>[ <i>Thermobifida fusca</i> YX]             |       |
| 6556 4SF |     |   | YP_289927, 2,3-dihydroxybenzoate-AMP<br>ligase [ <i>Thermobifida fusca</i> YX] | 70/75 |
| 6556     | 155 | 2 |                                                                                |       |
| 10DR     |     |   |                                                                                |       |

## pplementary Figures

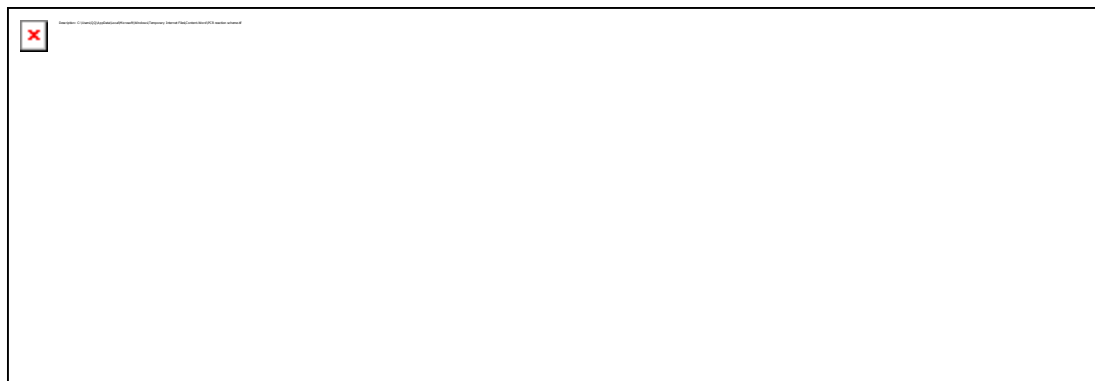

**Supplementary Figure 1.** Scheme for PCR amplification of target NRPS/PKS genes using reverse translated peptide sequences. Top panel shows a typical domain organization for an NRPS protein, where a condensation domain (C), an adenylation domain (A) and a thioation domain (T) are connected in tandem. The conserved regions of adenylation domains, A3 and A7, are also shown. A peptide matching to the NRPS is mapped to the domain context, and reverse translated into nucleotide sequences (peptide F and peptide R). PCR reactions can be performed using A3F/A7F as forward primer and peptide R as reverse primer (solid arrows), or on the other direction, using peptide F as forward primer and A3R/A7R from the next module as reverse primer (dashed arrows). The bottom panel shows a typical domain organization for a PKS protein, containing a ketosynthase domain (KS), a methyl-malonyl-CoA transferase (MAT) and an acyl-carrier protein (ACP), along with the conserved region K1 for KS and M6 for MAT. PCR reactions can be performed between K1F and peptide R as well as peptide F and M6R.

**(a) *de novo* peptide identifications from strain F-6133**

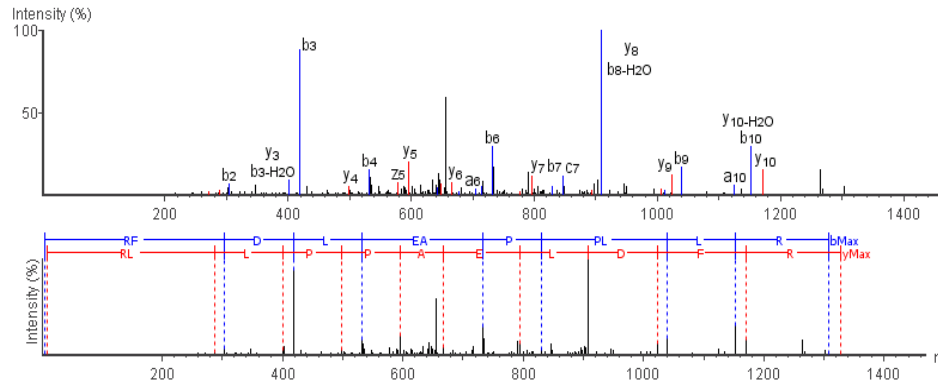

**RFDLEAPLLR**

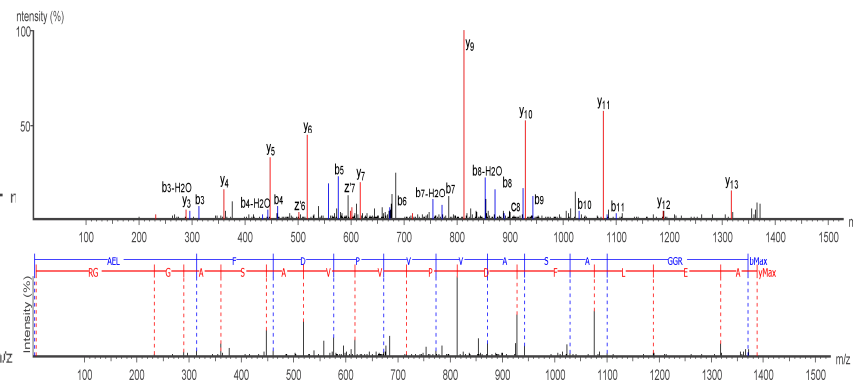

**AELFDPVVASAG[GR]**

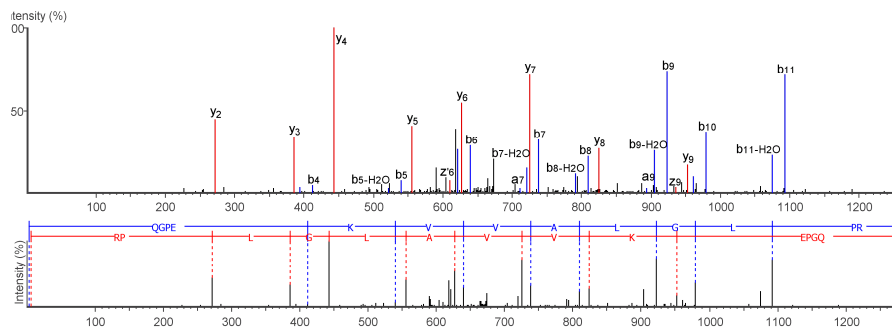

**[QGPE]KVVALGL[PR]**

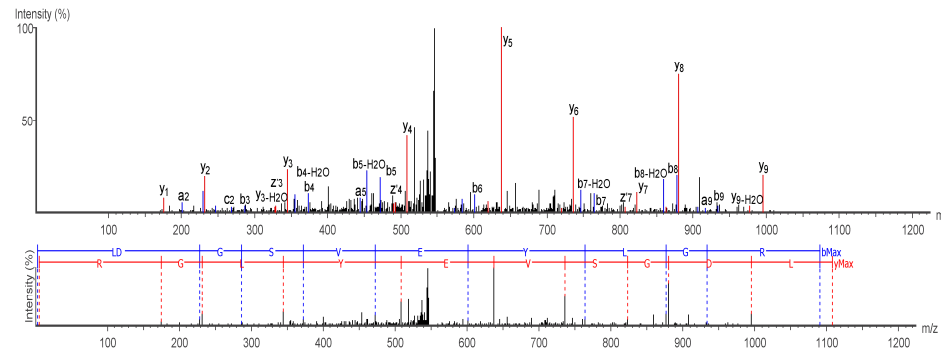

**LDGSVEYLGR**

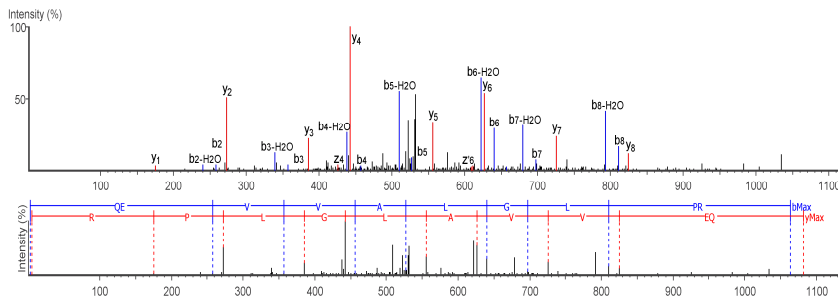

[QE]VVALGLPR

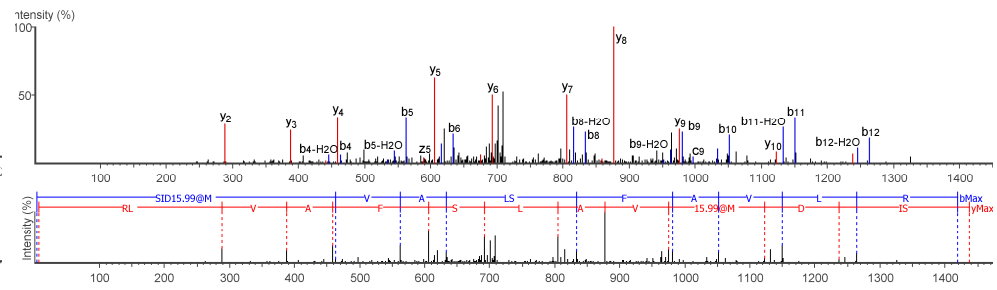

[SI]DmVALSFAVLR

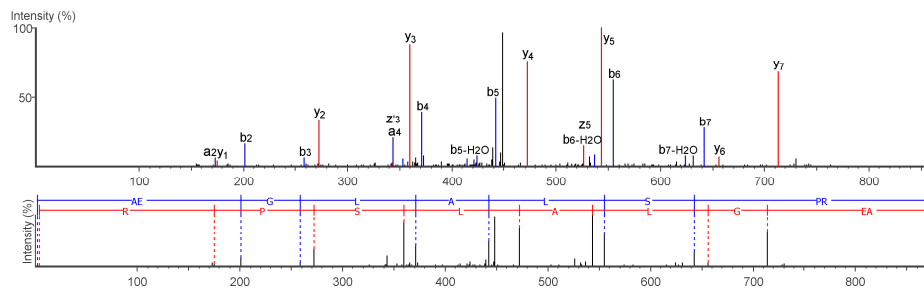

[AE]GLALSPR

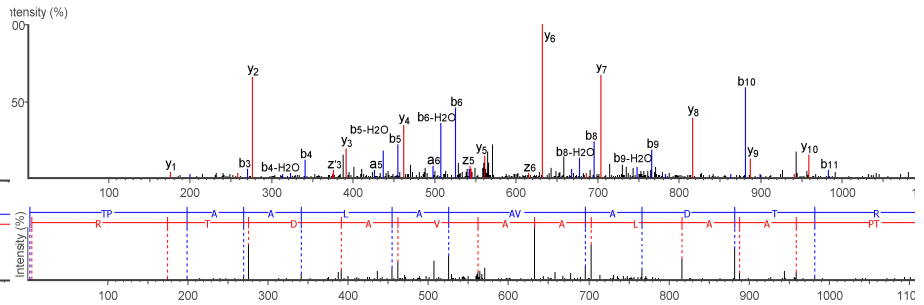

[TP]AALAAVADTR

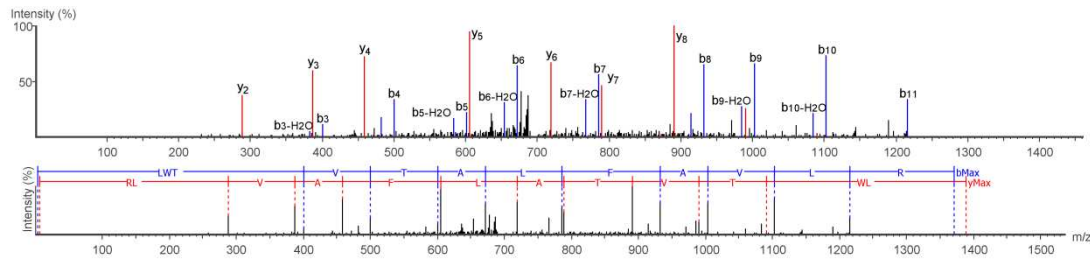

[LW]TVTALFAVLR

**(b) *de novo* peptide identifications from strain F-6556**

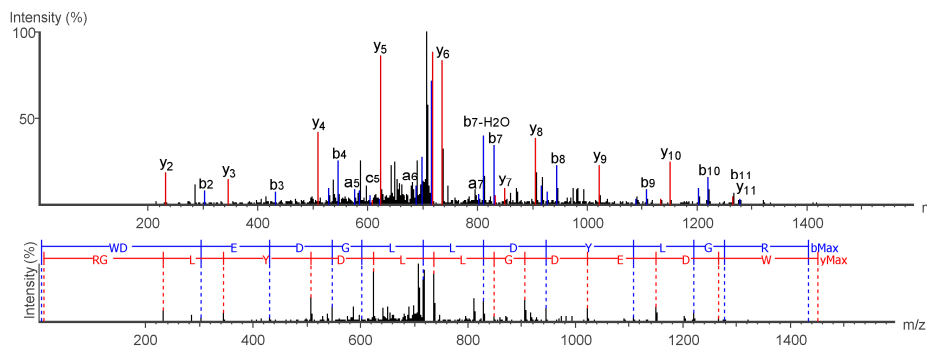

**WDEDGLLDLYLGR**

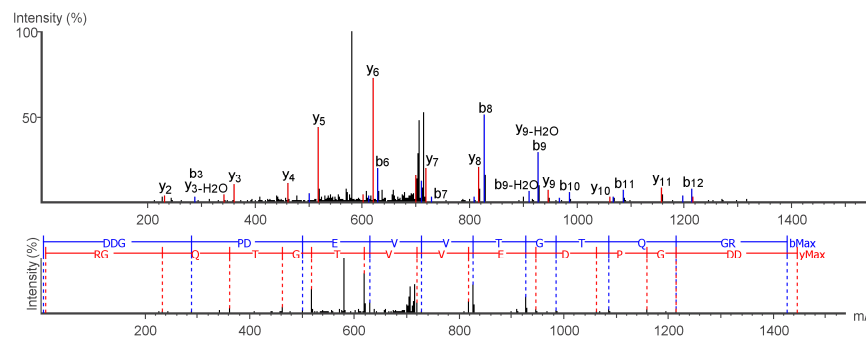

**DDGPDEVVTGTQGR**

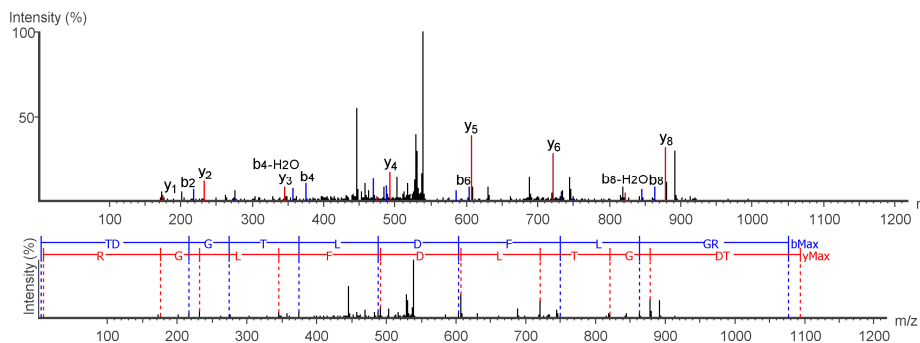

**[TD]GTLDFLGR**

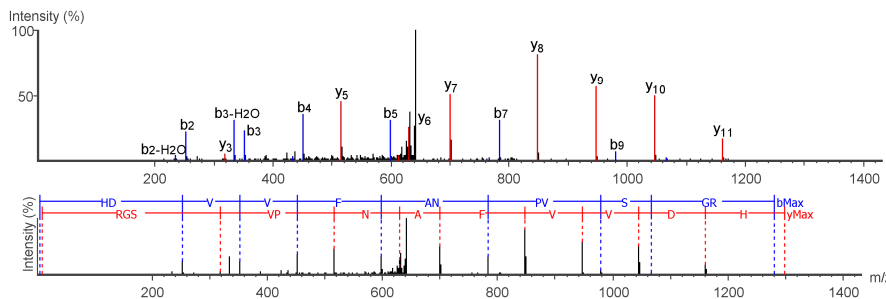

**HDVVFGQPVSGR**

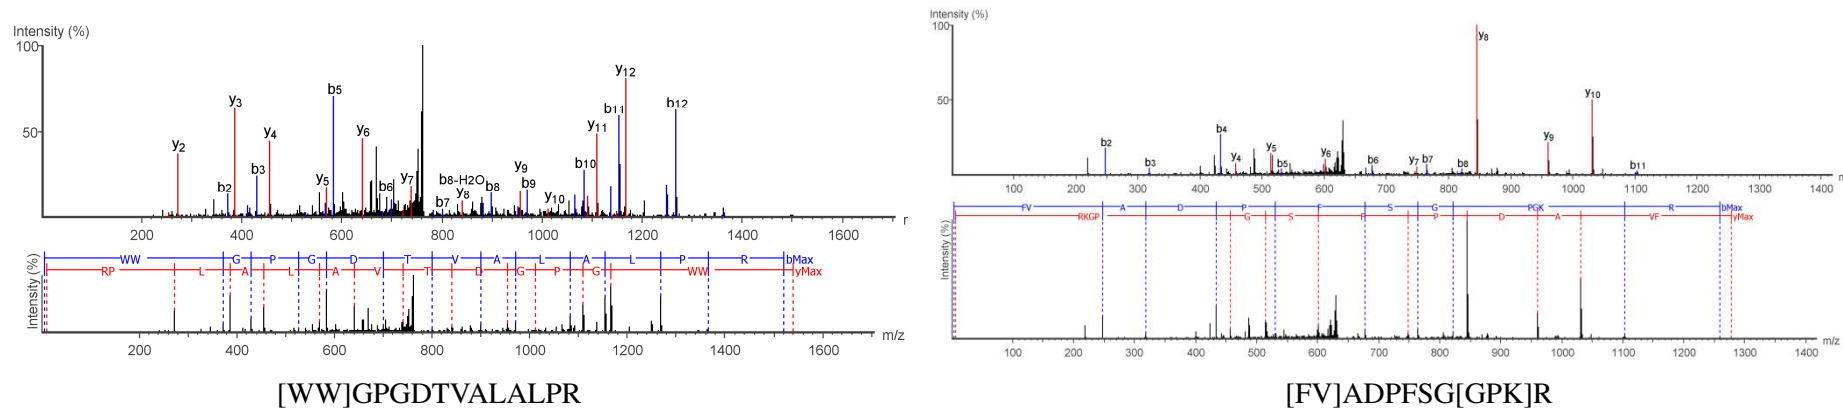

**Supplementary Figure 2.** MS/MS spectrum of peptide identifications by PEAKS Studio are shown for strains (a) F-6133 and (b) F-6556. For each peptide identified by *de novo* sequencing, an original MS/MS spectrum is shown on the top panel, with *b* and *y* ions labeled, as well as an alignment to the proposed peptide sequence shown at the bottom panel. A ‘[]’ indicates there is no fragment ion observed to clarify the sequence in the bracket. Other information of the identified peptides is shown in **Supplementary Table 2**.
